# Supplementary material
Source: PubMed Central journal article supplement (PMC6682749)
Supplement: supp_RA119.007609_143197_2_supp_329372_prb1hg.pdf [file supp_RA119.007609_143197_2_supp_329372_prb1hg.pdf]

Supporting Information for:

**Methanogenesis marker protein 10 (Mmp10) from *Methanosarcina acetivorans* is a radical S-adenosylmethionine methylase that unexpectedly requires cobalamin**

**Matthew I. Radle,<sup>1</sup> Danielle V. Miller,<sup>1</sup> Tatiana N. Laremore,<sup>2</sup> and Squire J. Booker<sup>1,3,4\*</sup>**

*From the <sup>1</sup>Department of Chemistry, The Pennsylvania State University, University Park, Pennsylvania 16802, the <sup>2</sup>Huck Institutes of the Life Sciences, The Pennsylvania State University, University Park, Pennsylvania 16802, the <sup>3</sup>Department of Biochemistry, and Molecular Biology, The Pennsylvania State University, University Park, Pennsylvania 16802, and <sup>4</sup>The Howard Hughes Medical Institute, The Pennsylvania State University, University Park, Pennsylvania 16802*

---

**Table of Contents**

1. Figures S1-S6

## Supporting Figures

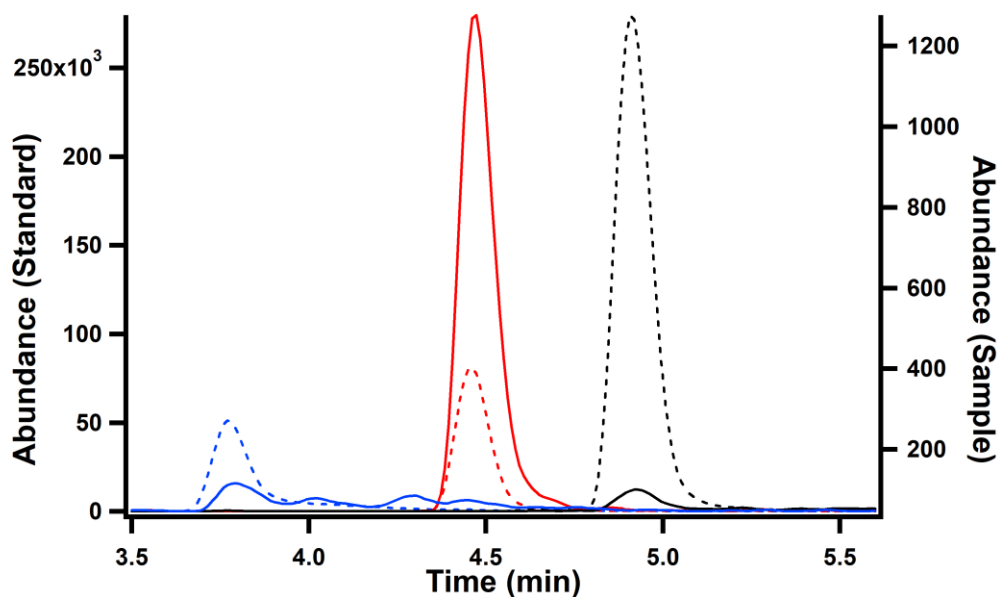

**Figure S1.** LC-MS analysis of cobalamin species bound to 1560  $\mu\text{M}$  *as-purified* MaMmp10. MaMmp10-associated OHCbl (solid blue line), MaMmp10-associated AdoCbl (solid red line), MaMmp10-associated MeCbl (solid black line), OHCbl standard (dashed blue line), AdoCbl standard (dashed red line), MeCbl standard (dashed black line).  $m/z$  transition for OHCbl, 664.9  $\rightarrow$  635.8  $[\text{M}+2\text{H}]^{2+}$ ; MeCbl, 673.0  $\rightarrow$  665.3  $[\text{M}+2\text{H}]^{2+}$ ; AdoCbl 790.6  $\rightarrow$  665.3  $[\text{M}+2\text{H}]^{2+}$ .

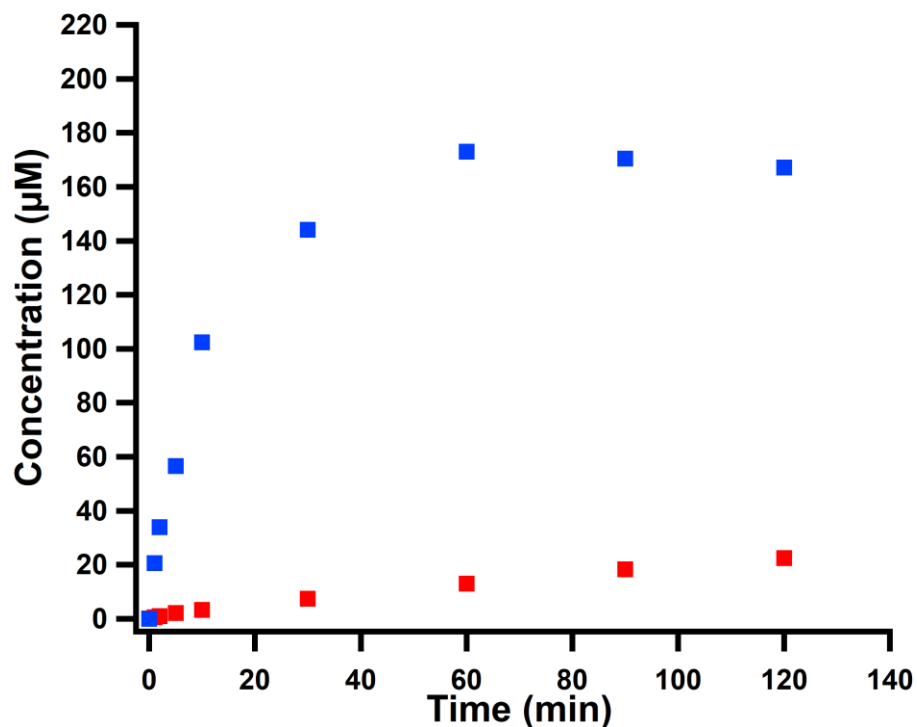

**Figure S2. Activity of *as-purified MaMmp10* versus Cbl-Rc *MaMmp10*.** Concentration of methylated peptide product for *MaMmp10* reaction (red squares) and concentration of methylated peptide product from Cbl-Rc *MaMmp10* reaction (blue squares). Reactions were conducted at 30 °C and contained the following components in a final volume of 200 µL: 50 mM HEPES, pH 7.5, 200 mM KCl, 50 µM *MaMmp10*, 280 µM peptide substrate, and 1 mM Ti(III) citrate. Reactions were initiated with 1 mM SAM.

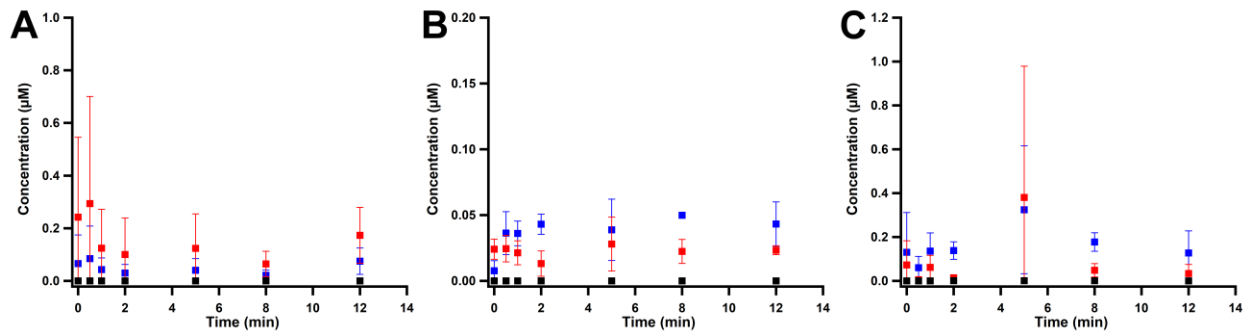

**Figure S3. 5'-dAH, SAH, and methylated peptide formation in the absence of SAM, in the absence of Ti(III) citrate, or in the absence of *MaMmp10*.**

(A) Cbl-Rc *MaMmp10* activity in the absence of SAM. (B) Cbl-Rc *MaMmp10* activity in the absence of Ti(III) citrate. (C) Formation of reaction products in the absence of Cbl-Rc *MaMmp10*. For Panels A-C, 5'-dAH is indicated by red squares, SAH by blue squares, and methylated peptide product by black squares. Reactions were performed in triplicate at 30 °C, and contained the following components in a final volume of 180 μL unless noted otherwise: 50 mM HEPES, 200 mM KCl, 10 μM *MaMmp10*, 0.5 mM Ti(III) citrate, and 100 μM peptide substrate. Reactions were initiated with 0.5 mM SAM or an equivalent volume of buffer.

|         |     |                                                              |     |         |     |                                                              |     |         |     |                                                             |     |
|---------|-----|--------------------------------------------------------------|-----|---------|-----|--------------------------------------------------------------|-----|---------|-----|-------------------------------------------------------------|-----|
| OxsB    | 61  | LY-----VIEDSSKHVFSNRLREPLMLRM-----HPSWYIE                    | 96  | OxsB    | 184 | SVYFQGR-----K-LAPEILDLYSHTEGDLSSITVYVIVSFSPEQ-----           | 226 | OxsB    | 302 | --RGALEFDRKCDYSRCPDQKGRS-WHPLSVQTLKQDLDLRAAGHFKHFK          | 358 |
| TsrM    | 0   | -----                                                        | 0   | TsrM    | 67  | HNIDTPTVYAFQRFVGEHREITETIS-RLTD---APVVGIGESMFLIV---          | 116 | TsrM    | 214 | RRGGLSLITKNGAY-RESHLEKPAKTRVQRELASV---VDMESLAQ-GILDQR       | 268 |
| ThnK    | 0   | -----                                                        | 0   | ThnK    | 71  | CVVWFM-----R-RQMKVAKLKERYPD---MLVAGSPHVP-----D               | 105 | ThnK    | 192 | GLAFYALM--NNGCYP-SCAPDWDGASATMSALMFEERVV---QHEIWFARN-DVE-DL | 245 |
| PhpK    | 21  | LQGGDGLPAPIRSMRKTIKLGGTHSYLDALSRVTERHNPVGSYTVVAELPSLGT---    | 79  | PhpK    | 120 | ITVYFM-----PAFVIEIRVQVHATY---VPIIVGQPLT---DNHCRGRGGE         | 163 | PhpK    | 242 | --GRVYTRTRASCAP-NCAPDYPHAGA-LGLADLSTV---ERELEE-LAERGKRYVA   | 293 |
| BchE    | 0   | -----MNLAVAA---FSVTEGNGVFLVFKPFRGCMVEI-GRH---VPIGL-          | 26  | BchE    | 71  | IN-ITPS-----IFKAQIMKIAKRVKNN---IRTMCGHSTFMYQVLT---           | 112 | BchE    | 192 | LNCLAVFNFAFGCFP-TCTFSCQWFR-RYRARSPKNF---VDEIELVKKYKGFPI     | 246 |
| GenK    | 1   | -----MNLAVAA---FSVTEGNGVFLVFKPFRGCMVEI-GRH---VPIGL-          | 40  | GenK    | 116 | SMFTPY-----YESAYELAMAKRVLPN---AKVILCQHGTVAFPHVL---           | 157 | GenK    | 240 | --GNVTLITSRGCFP-SCSPTVHATVKGQFRARDPQRV---VDEIELRVYHGVRRFL   | 292 |
| Fom3    | 19  | IR--WGLDPRQVGR---PETR--RYGRVLLNLSATLFRHDLPRCT---YFGLG---     | 62  | Fom3    | 123 | SIFSNQ-----ADNVHLLKADLVTPTE---AVTALSAHARVFFKACL---           | 164 | Fom3    | 269 | VGSRVQTLTSGTGA-RGTFPTVWVQKLRARRSQDV---VDEIELRDEIGDIEFH      | 324 |
| MaMmp10 | 0   | -----                                                        | 0   | MaMmp10 | 0   | -----                                                        | 0   | MaMmp10 | 32  | FLGCKYLFPPKGGDY---CTKSVGS--YSGFLKWLQVLEITANLYFTFGV-EVKRFT   | 84  |
| OxsB    | 97  | SKEIYKCKLSCREYHELELPTVTVNLVNIENFIPIRANLGTLSYLKREQLAKVE       | 156 | OxsB    | 227 | -----FFERYPS-LLICDKEGTYLRDLRMLKELKEL---KLDVNGVIGYVDSRGEVKNVA | 278 | OxsB    | 359 | MALEFIFGLNGTGAQRLLIDICEGLAKREKIKFDFAARASDYEKPKKENVKRV       | 416 |
| TsrM    | 1   | -----MSRLVLLVNPKNVPPPIAFLALDVLTTALEDGFEVEF                   | 38  | TsrM    | 117 | -----EYFGLIEYGVKSGEIKLCLALTAISGR---DTAGILRMTREBGAVRVPA       | 166 | TsrM    | 269 | T-TDSEF-----NLSIAHAKNLLREIVRRRHADPNPLNR-----LRLNVYQPS       | 312 |
| ThnK    | 1   | -----MSTESSRRKRVYFGLNAVFPFLPVAGLLTVAQDEQ---                  | 38  | ThnK    | 106 | KVGDFTQHPYVDVLAHSGCVAFRELLSARLQDA---PVTTCVGVTVNRNAPVAGPA     | 163 | ThnK    | 246 | FICDANF-GIMPRLDLTAHALAEARTEAGSPKQIVNFMN-----SNDRVFDI-       | 293 |
| PhpK    | 80  | -----LIVYVLEHGHPTDF                                          | 95  | PhpK    | 167 | KLRSFDVQADYFTWESGSEALAGLVQAGSAPVAFV---VFRADGWEKLR-           | 219 | PhpK    | 294 | F-ITPTF-----NVMRRFKOLCRMMVRDFGIEMFSYFR---CCH-ARE---         | 333 |
| BchE    | 27  | -----AVIGGALKQAGFNQVK                                        | 42  | BchE    | 113 | -----EAPETYDVVSGEIVTVMLKALAGNKKETSSEITGIAYIDNGKVFATA         | 165 | BchE    | 247 | L-DLSEF-----TINKQFVSLCQRLIDKLDVMTGINFR---VTDIMRD-           | 287 |
| GenK    | 41  | -----AYVSSALRAAGHETEI                                        | 56  | GenK    | 158 | -----EVPEIDAVMLGEAVTIVALLDAFATGR---PLTELLGVAFRCGGELCDCTP-    | 206 | GenK    | 293 | V-EDNPF-----TFDERVHAICQEVIRRGLDVLRLSPMG---MTVVKLT-          | 333 |
| Fom3    | 63  | -----GYIAAVLEKYGYEYKI                                        | 78  | Fom3    | 165 | -----DDFNLDVFLGEGMTFLLMHEHLNGNV---SDDEVHGIARWDRDKVQIKPE      | 214 | Fom3    | 325 | I-ODNI-----TNDMHARELFRF--KEVGLPWATPG-----TALNRMD-           | 363 |
| MaMmp10 | 0   | -----                                                        | 0   | MaMmp10 | 0   | -----DDFNLDVFLGEGMTFLLMHEHLNGNV---SDDEVHGIARWDRDKVQIKPE      | 0   | MaMmp10 | 85  | VSQGD-LSCYELKSLITFLSQFN---TFHLIGTSG---KGFSK-                | 123 |
| OxsB    | 157 | L-----IDMQVGTPIQLIINKLLSQPDIQL                               | 183 | OxsB    | 279 | ETV-----NKEEPTVPSIDILGSIKFP-----                             | 301 | OxsB    | 417 | ---LDMWNYCALAGADRIHIGVSGSQQLKRV-----GKCT-TSEQNIALRLVLSAGI   | 467 |
| TsrM    | 39  | LDLTFR-----RDDWKTCLH-----EYFAERSPMIVCV                       | 66  | TsrM    | 167 | VLTVRHGK-----TQPAEPTQV-----EPRVQVQ-DQLSVVRRSGVPRKVDMLLEY     | 213 | TsrM    | 313 | PFDEFADLLAAGCRGVNVDSDHIRELLSGLWVKTEKGGTYTFEDTERLVRICRERGI   | 372 |
| ThnK    | 39  | IAASYD-----FQEP-----LFLVAPQEMA-DGITEPVDVAL                   | 70  | ThnK    | 164 | KRL-----PQRIETSPYLVGMGAVKTC---R---ER                         | 191 | ThnK    | 294 | ---SKAWHADL--LMGTTLSMQSTDMVDLEAI---DRKNIGLDNYRKLQRYAVENI    | 343 |
| BchE    | 96  | V-NSFT-----YERERLAK-LLDGSPASVAT                              | 119 | PhpK    | 219 | -----KR-----PENNDLNR-ASVWRHFRGA-DVL-----                     | 241 | PhpK    | 334 | ---PGVYDLMYDSCGRVLLGSEGGDQVLLM---DKRA-TTEHYRYEQLKARGI       | 384 |
| PhpK    | 43  | FVDM-----ADDLPDETIEIRIKRQPDVMT                               | 70  | BchE    | 166 | HP-----VIEDLDTL-SPDWSLYDM-DKYITYTP-----                      | 191 | BchE    | 288 | ---EDLLPFYRAGLVHVSILGTEAASQGMNRF---RGET-TTEHYRYEQLKARGI     | 338 |
| GenK    | 57  | F-DLAVTEEDHNVDAELTTERAKLERHPRWHLHMGARERIEALAAAGADVQI         | 115 | GenK    | 207 | -----POTHIIFR-----APVADLDSLAPPAQGLD-IRM---                   | 238 | GenK    | 334 | ---EDLVESVAGDDELGLLETTAARLRM---RGETSLDRVSAVALFEKGL          | 385 |
| Fom3    | 79  | L-DYFAEGYVNAQV-----DGGDQFLRYGLSDDIIVKMEKGFVDVGI              | 122 | Fom3    | 215 | LPLIISMRPEGPEFKGKSPMLSMAGLHRIFFPAHHNYM-EKYFEIK---AYGSPYF     | 268 | Fom3    | 364 | ---RELLDMAESGAYQVTFASISGQVRLKEL---MKPFLNLETSHLIKVARSIGM     | 415 |
| MaMmp10 | 0   | -----                                                        | 0   | MaMmp10 | 1   | -----M---VVVDVGNFGVDCGKGF-KYGYFK---KVK---DIQ                 | 31  | MaMmp10 | 124 | ---PDDALFYIDNGVTEVSTVFATDPALEAY---IKDPLN---EPASIVLWDFCT     | 171 |
| OxsB    | 468 | NL-RIGFIMFDQMLKGLONIKENLFLERDALKMF-----I-D-IG                | 506 | OxsB    | 595 | -----EAQCMWIDSNFQVMTT-----KSLRKA-----NPREKKLYSY---ME         | 631 | OxsB    | 703 | -----DVEADLNGK---IITDS-EDHR---LENTLKR-WFSMDGN---WSL         | 737 |
| TsrM    | 373 | LT-MVEALFGMPGET-PETVACQDAFMALDATVGT-----FSLGLR               | 412 | TsrM    | 485 | -----PARAADPEERHGVAV-----                                    | 499 | TsrM    | 565 | AAQS-----SHLPTFV-----                                       | 575 |
| ThnK    | 344 | HT-YTELILGLPLET-ARTFREGISLLEAGNHEDI-----R---VY               | 380 | ThnK    | 477 | GLQNHFTDRPTSFIGLSYLRMRSLYQYDIDIPLELANVAS---QPDLATHLAP---YG   | 530 | ThnK    | 609 | ---GGPLRQVRVEYTDQPGANGRFRPAGDLKAFALAIGPSYVPSRIGHVRH--RI     | 663 |
| PhpK    | 385 | FT-HASVYVGFPGES-PETVFNIFIDFNNAGPDTFA-----VN                  | 420 | PhpK    | 466 | -----SV---HAASWVYVGL-----DFWVFPY---LL-----GRGMS              | 492 | PhpK    | 547 | -----EDLVESVAGDDELGLLETTAARLRM---RGETSLDRVSAVALFEKGL        | 546 |
| BchE    | 339 | VA-EAQFVWGLEHET-PETIEEYQLCKMDQFM-A-----NWTIYT                | 377 | BchE    | 430 | ---ARKTFYFHWIKDYVFRKYL-----GCLAFRA---KTLFRKFFIDIRVKT         | 473 | BchE    | 536 | -----RDRSTSTVYRNC-----                                      | 546 |
| GenK    | 386 | TA-SAAIIVGLPDSQ-LDA-----IVQ---DAVNL-----VLGAVE               | 416 | GenK    | 468 | -----TAWVGTLM-----ALWERYV-----LEGAERR---RQGPV                | 495 | GenK    | 576 | LYSQQPQVSAQVGAQTAGDAECCSFMVPT-GER---IGRIQR-FVLELDMRRDAEL    | 630 |
| Fom3    | 416 | HV-HGFTIIVMPFC-GNAGESIEMQASDYAEEA-----GFSSAS                 | 455 | Fom3    | 498 | -----LWDGEIA-----ELAAKFN-----RDNARR---DRAYT                  | 524 | Fom3    | 534 | -----                                                       | 534 |
| MaMmp10 | 172 | HCEVYGAIVLFGINDGEVLEKTLCDLENMGAKALMRFANQENGLILNNSPIIPGIT     | 231 | MaMmp10 | 297 | -----SRLTEIFALGGTVNV---I-PVKKIDGLTIDDFKALDSEVTET---VFI       | 342 | MaMmp10 | 411 | -----                                                       | 411 |
| OxsB    | 507 | DMTYEELVYKLDKNDK-EFISKKTKSP-VYIVSYMLA---SMIIL---MPTFYSRMQLNE | 560 | OxsB    | 632 | THREISHLKLYVYNLSPOKESQIILSDFLMSHSEHILDS-----KINVDGSK         | 683 | OxsB    | 693 | -----                                                       | 693 |
| TsrM    | 413 | LF--PYTMMK---EIAQCAQV-R---TAPGLQSTADGPIVLPK                  | 449 | TsrM    | 500 | -----ADNALI---DPADHHRVMLPVE---GMS                            | 526 | TsrM    | 526 | -----                                                       | 526 |
| ThnK    | 381 | EGYLLFNAPIN-----T---PEKIAGYGLR--TVFKLYVERFGT---PDD           | 418 | ThnK    | 531 | RRRGVTDINWGLKVAETEERFDH-ELVDLRT---LGLDPPDQ                   | 570 | ThnK    | 570 | -----                                                       | 570 |
| PhpK    | 421 | HHYLISTPIH-----V---RAPQDITGNGFT--W-----NVRASG                | 446 | PhpK    | 493 | REQVVE-FL--A-----LAKPL--TTA-----                             | 516 | PhpK    | 516 | -----                                                       | 516 |
| BchE    | 378 | FW--PFDLPE-----KELGDRVVRDYRYNFV--S-----                      | 404 | BchE    | 474 | KNRKEIDL-GPD-----QSRILQTEAK-----NLKERRP                      | 503 | BchE    | 503 | -----                                                       | 503 |
| GenK    | 417 | FWT-NFFYPIY-----GSPDYQTCLSRGIV--D-----                       | 441 | GenK    | 496 | SAAEAA-----ARLV-EHMA-----QLDPESP                             | 517 | GenK    | 517 | -----                                                       | 517 |
| Fom3    | 456 | FP--ASRPIY-----GSELLREICRQGFV--D-----                        | 478 | Fom3    | 525 | PQGMN-----AN-----QY-----                                     | 534 | Fom3    | 534 | -----                                                       | 534 |
| MaMmp10 | 232 | PHVSEFTIEVRSAAEKHSIRITQTPLEDPLIGSFAIRNVFEA-----LL----        | 278 | MaMmp10 | 343 | PCRAF-----VHMEIKEARLRDGDVRIVRGPERLSVDGEMSIQMTRE              | 386 | MaMmp10 | 386 | -----                                                       | 386 |
| OxsB    | 561 | KKEEVLNIMNDQDMMNRVA--TSFVDK-----TNGNLS                       | 594 | OxsB    | 684 | ENILNVM-----GLGY-----TNWQLMEKLLR---                          | 702 | OxsB    | 702 | -----                                                       | 702 |
| TsrM    | 450 | LRM-CASPA-----EYERQFMD-----EHNFRLL--VCYFS-----PGLLPD         | 484 | TsrM    | 527 | NNYADN-P-FLTSLG---GLGY-----TGAFWSHWRGRIEMRKAREA              | 564 | TsrM    | 564 | -----                                                       | 564 |
| ThnK    | 419 | EAETMDMWE---TSAMPDQENWESFVQAVQFLHNGCTTYRLSVYLRGHRGIFTAFYE    | 476 | ThnK    | 571 | ARLRDLVRFGRDV---MLR-PDIDA---QH---GKTAETDHDWFGYFG             | 608 | ThnK    | 608 | -----                                                       | 608 |
| PhpK    | 447 | -----S-----HRT--MD--S---RQALEAR-----DEIFT                    | 465 | PhpK    | 517 | BARAKAERARSFFVGGHLEPRYDAG-----GQR                            | 546 | PhpK    | 546 | -----                                                       | 546 |
| BchE    | 405 | -----PIKPD-NMERE---D--V---LKGVLKS-----YGRFY-                 | 429 | BchE    | 504 | EMIAD-----MSFGLK---EAGYQ-----REHEDNDEFFDESTI---              | 535 | BchE    | 535 | -----                                                       | 535 |
| GenK    | 442 | -----PLTDP-LFDQFN--FA---F---ANGVLAA-----DELY-                | 467 | GenK    | 518 | EELPATVRAIRETADGLL--ALGHPLGCVCMQHVADADKAGADQCFRAFAGMIAAAIA   | 575 | GenK    | 575 | -----                                                       | 575 |
| Fom3    | 479 | -----PEESL--YR--MT--Y---KQGLINV-----PG---                    | 497 | Fom3    | 535 | -----                                                        | 534 | Fom3    | 534 | -----                                                       | 534 |
| MaMmp10 | 279 | -----KLP-----RVS-----KKATTITGVAA-----                        | 296 | MaMmp10 | 387 | EVLELEVENFTELIGQIN--SLGLPLE-----                             | 411 | MaMmp10 | 411 | -----                                                       | 411 |

**Figure S4.** Truncated sequence alignment of Class B radical SAM methyltransferases. Highlighted in grey is the predicted or known cobalamin binding domain from Uniprot (1). Highlighted in blue is the SAM binding domain of OxsB (2). The conserved cysteines of the radical SAM domain are highlighted in yellow. The residues from OxsB shown to interact with cobalamin are shown with white lettering and highlighted in navy. The organisms are as follows for the alignment from top to bottom with the accession number and percent identity to OxsB in parenthesis: *Bacillus megaterium* (O24770), *Kitasatospora setae* (E4N8S5, 16.5%), *Streptomyces pentosus* (E8W2A9, 17.0%), *Kitasatospora phosalacinea* (A0A0M3N271, 16.4%), *Chlorobaculum tepidum* (H2VFK1, 23.0%), *Micromonospora echinospora* (A0A0K0K526, 18.1%), *Streptomyces wedmorensis* (Q56184, 18.0%), and *Methanosarcina acetivorans* (Q8THG6, 15.1%).





**Figure S5.** Truncated sequence alignment of *MaMmp10* and *MmMmp10* with representative DUF512 family members. DUF512 sequences were chosen at random from more than the 3,000 from InterPro (3). Red highlighting represents 100% amino acid conservation between the twenty-two sequences in the alignment. Grey, dark cyan, light blue, and olive green highlighting represents amino acid conservation greater than 85% but less than 100% where grey represents the hydrophobic amino acids A, I, L, V, M, P, and G; dark cyan represents the aromatic amino acids F, W, and Y; light blue represents the charged amino acids D, E, H, R, and K; and olive green for S and T. The residues in red text represent conservation greater than 25% and less than 85% between *MaMmp10* and the DUF512 proteins. Q, N, and C did not show conservation greater than 25% except for the cysteines in the radical SAM motif, denoted by CXXXXCXXC above the aligned sequences. The PDZ, Aldolase-type TIM barrel, and DUF512 domains are generalized for all of the sequences and were determined from InterPro (3). The accession numbers in the sequence alignment correspond to the following organisms with the percent identity of each sequence to *MaMmp10* in parenthesis: Q8THG6, *MaMmp10*; Q6LX00, *Methanococcus maripaludis* S2 (45.9%); A0A0K2HHB4, *Bacteroides dorei* (13.4%); A0A0A1ZFH5, *Clostridium marinus* str. MIT 9116 (17.9%); A0A068MV33, *Synechococcus* sp. (PCC 6714) (18.9%); A0A367RII2, *Nostoc punctiforme* NIES-2108 (20.3%); Q182W7, *Peptoclostridium difficile* str. 630 (18.8%); A0A072X0Q4, *Clostridium botulinum* C/D str. It1 (18.1%); A0A0H2YRV6, *Clostridium perfringens* (ATCC 131124) (19.8%); A0A0B5QA96, *Clostridium beijerinckii* (16.8%); A0A2U3DCR3, *Acidibacillus sulfuroxidans* (17.2%); A0A1H0HVY8, *Eubacterium limosum* (20.0%); A0A173UKJ0, *Faecalibacterium prausnitzii* (19.4%); A0A0S2W3K9, *Intestinimonas butyriciproducens* (20.8%); A0A1Y4LMK6, *Butyricicoccus pullicaecorum* (20.8%); A0A0S6UD50, *Moorella thermoacetica* Y72 (22.8%); Q8TVA4, *Methanopyrus kandleri* DSM 6324 (21.5%); A0A016QUC2, *Deinococcus puniceus* (17.9%); A0A2Z2M7L8, *Thermococcus gorgonarius* (20.0%); A0A0S1XAH9, *Thermococcus barophilus* (20.6%); I6U6R8, *Pyrococcus furiosus* COM1 (20.0%); O58868, *Pyrococcus horikoshii* ATCC 700860 (22.1%).

ATGGAAGTTGTTGTTGACGTTGGTGGTAATCCGGGTGTTGATTGTAAAGGCTTTTGCAAATACTGCTATT  
TCAAAAAAGTGAAAGACATTTCAGCCGCTGGGTTGTAATATTGTCTGCCGTTTAAAAAGGGCTGCGATTA  
TTGTACCCGTAGCGTTAAAGAAAGCTATAGCGGTTTTAAAGCCTGCAGATGGTTCTGGAAGAAACCGCA  
AATAAACTGTATTTTACCAGCGGTGAGGTGAAAAAATTCACCGTTAGCGGTGGTGGTGTATCTGAGCTGTT  
ATCCGGAAGTAAAAGCCTGATTACCTTTCTGAGCCAGTTTAATACCCCGATTTCATCTGGGTTATAACCAG  
CGGCAAAGTTTTAGCAAACCGGATGATGCACTGTTCTATATTGATAATGGTGTACCGAAGTGAGCTTT  
ACCGTTTTTGCAACCGATCCGGCACTGCGTGCAGAAATATATGAAAGATCCGGAACCGGAAGCAAGCATT  
AGGTTCTGCGTGATTTTTGTACCCATTGCGAAGTTTATGGTGCCATTGTTCTGCTGCCTGGTATTAATGA  
TGGTGAAGTGCTGGAAAAACCCTGTGTGATCTGGAAAATATGGGTGCAAAGGTGCAATTCTGATGCGC  
TTTGCAAACTTTCAAGAAAATGGCCTGATTCTGAATAACAGCCCGATTATTCCGGGTATTACCCGCATA  
CCGTGAGCGAATTTACCGAAATTGTTTCGTAGCAGCGCAGAAAAACATCCGAGCATTTCGTATTACCGGTAC  
ACCGCTGGAAGATCCGCTGATTGGTAGCCCGTTTGCAATTCGTAATGTTCCGGAAGCACTGCTGAAACTG  
CCTCGTGTTAGCAAAAAAGCAACCATTATTACAGGTCAGGTTGCAGCAAGCCGCTGACCGAAATTTTTG  
AAGCATTAGGTGGCACCCTTAATGTGATCCCGGTTAAAAAGATATTGGTTGCCTGATCACCATCGATGA  
TTTTAAAGCACTGGATCTGAGCGAAGTGACAGAAACCGTTTTTATTTCCTGGTTCGTGCATTTGTGCATGAT  
ATGGAATCAAAGAAGCCCTGCGACGCGACGGTGTGATCGTATTGTTTCGTTCGTGGTCCGGAACGTCTGA  
GCGTGGATGGTGAATGAGCATTGGTATGACCCGTGAAGAAGTTCTGGAAGTGAAGTTGAAAACTTTAC  
CGAACTGATTGGCCAGATTAATAGCCTGGGTCTGCCGCTGGAA

**Figure S6.** Gene sequence of codon-optimized *MaMmp10*.

## References

1. Consortium, U. (2014) UniProt: a hub for protein information. *Nucleic Acids Res.* **43**, 204-212
2. Bridwell-Rabb, J., Zhong, A., Sun, H. G., Drennan, C. L., and Liu, H. (2017) A B12-dependent radical SAM enzyme involved in oxetanocin A biosynthesis. *Nature* **544**, 322–326
3. Mitchell, A., Chang, H.-Y., Daugherty, L., Fraser, M., Hunter, S., Lopez, R., McAnulla, C., McMenamin, C., Nuka, G., Pesseat, S., Sangrador-Vegas, A., Scheremetjew, M., Rato, C., Yong, S.-Y., Bateman, A., Punta, M., Attwood, T. K., Sigrist, C. J. A., Redaschi, N., Rivoire, C., Xenarios, I., Kahn, D., Guyot, D., Bork, P., Letunic, I., Gough, J., Oates, M., Haft, D., Huang, H., Natale, D. A., Wu, C. H., Orengo, C., Sillitoe, I., Mi, H., Thomas, P. D., and Finn, R. D. (2015) The InterPro protein families database: the classification resource after 15 years. *Nucleic Acids Res.* **43**, D213–D221
